# Supplementary material for: Stochastic simulation of reference rainfall scenarios for hydrological applications using a universal multi-fractal approach
Source: Copernicus journal article supplement (doi:10.5194/hess-26-6477-2022), 2022-12-22
Supplement: Supplementary file 1 [file hess-26-6477-2022-supplement.pdf]

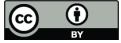

*Supplement of*

## **Stochastic simulation of reference rainfall scenarios for hydrological applications using a universal multi-fractal approach**

**Arun Ramanathan et al.**

*Correspondence to:* Arun Ramanathan ([arun.ramanathan@enpc.fr](mailto:arun.ramanathan@enpc.fr))

The copyright of individual parts of the supplement might differ from the article licence.

## Supplementary Information

### Supplement A:

To get more accurate  $\alpha$  estimates for the first scaling regime an iterative DTM procedure is implemented here. Following earlier studies (Hoang et al., 2012) the idea of this procedure is to estimate  $\eta_{min} = \left(\frac{C_\Sigma}{C_1}\right)^{\frac{1}{\alpha}} \max\left[1, \frac{1}{q}\right]$  and  $\eta_{max} = \left(\frac{1}{C_1}\right)^{\frac{1}{\alpha}} \min\left[1, \frac{1}{q}\right]$ : first using an initial guess of  $\alpha, C_1$  (based on initial guesses of  $\eta_{min}$  and  $\eta_{max}$ ) then subsequent  $\eta$  range and  $\alpha, C_1$  estimates are obtained in each iteration until there is no longer any change in the  $\eta$  range and therefore the  $\alpha, C_1$  estimates. The codimension (difference between the dimension of the embedding space and that of the dimension of the set under consideration) of non-zero rainfall support  $C_\Sigma = 1 - D_\Sigma$  (here  $D_\Sigma$  is the fractal dimension of rainfall greater than the minimum threshold considered). However, the procedure used here is slightly modified: instead of searching for both  $\eta_{min}$  and  $\eta_{max}$  simultaneously in each iteration, the current procedure fixes  $\eta_{min}$  as a constant value (here it is initially 1) and obtains different  $\eta_{max}, \alpha, C_1$  values in each iteration. If the  $\alpha$  estimate is still  $> 2$  or if the  $\alpha$  values keep changing even after a certain number of iterations,  $\eta_{min}$  is slightly reduced and the whole procedure is repeated. A  $q$  value of 0.8 is used here so that the usable range of  $\eta$  is larger (since the multifractal phase transition due to divergence of moments is more delayed) resulting in more reliable  $\alpha, C_1$  estimates.

### References:

Hoang, C. T., Tchiguirinskaia, I., Schertzer, D., Arnaud, P., Lavabre, J., and Lovejoy, S.: Assessing the high frequency quality of long rainfall series, *Journal of Hydrology*, <https://doi.org/10.1016/j.jhydrol.2012.01.044>, 2012.

**Figures:**

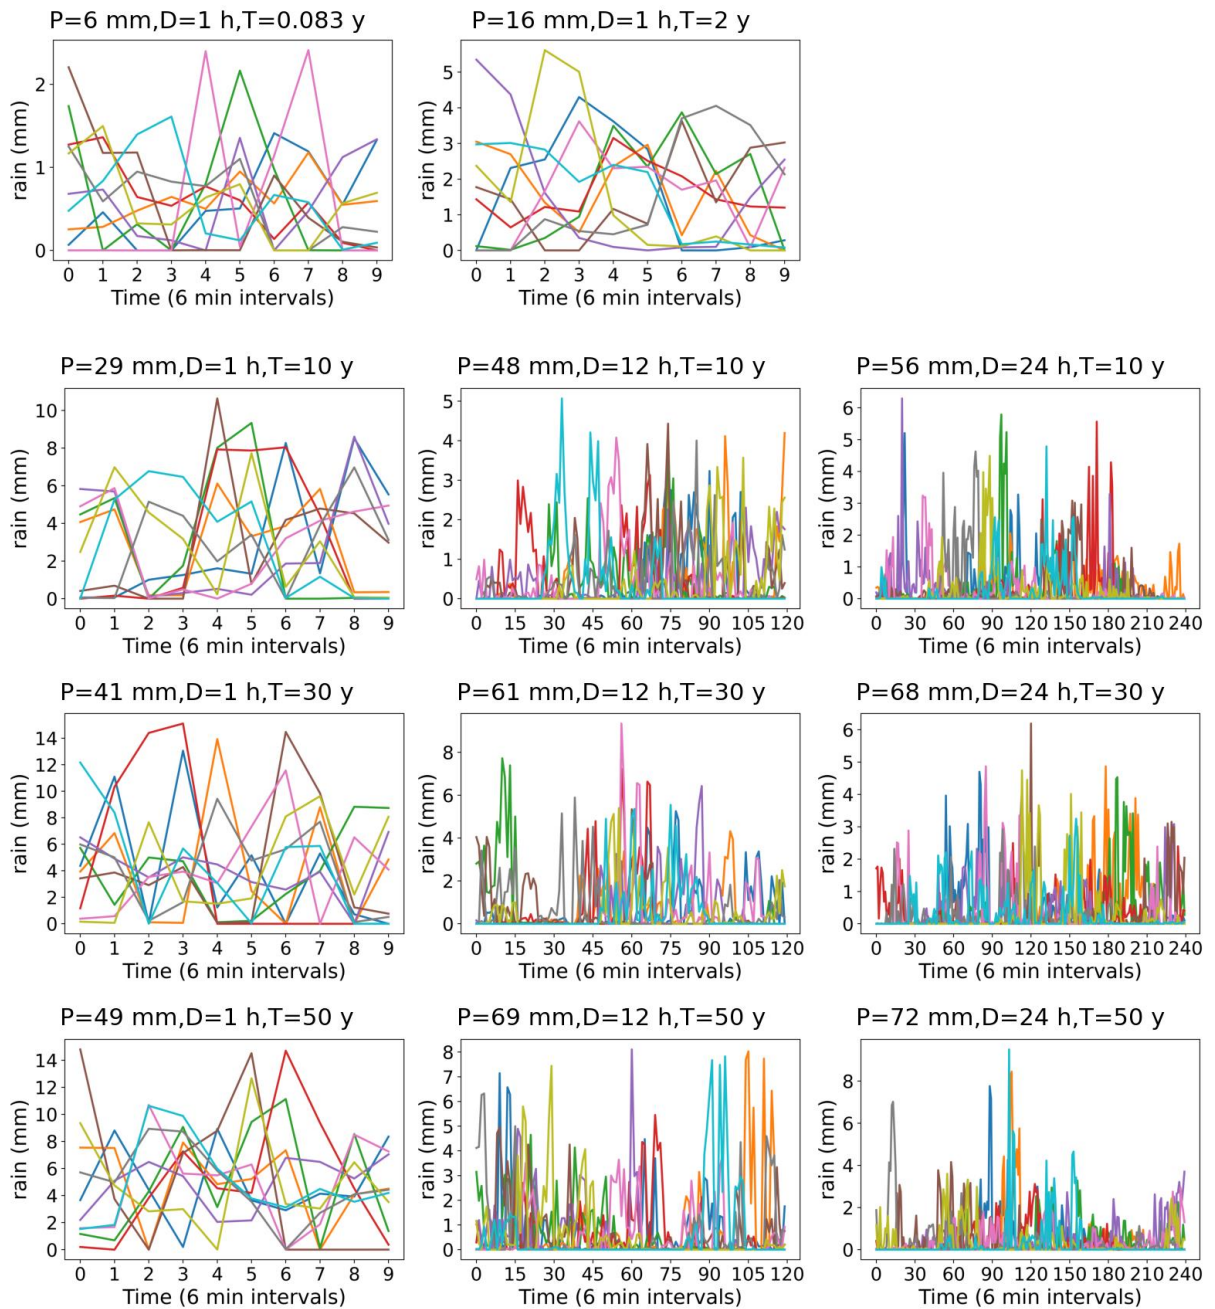

**Fig. S1.** Ten rainfall scenarios (indicated by different colours) for Nantes with  $P$  mm rainfall in  $D$  hours (events such as these or more severe than these occur with a return period of  $T$  years).

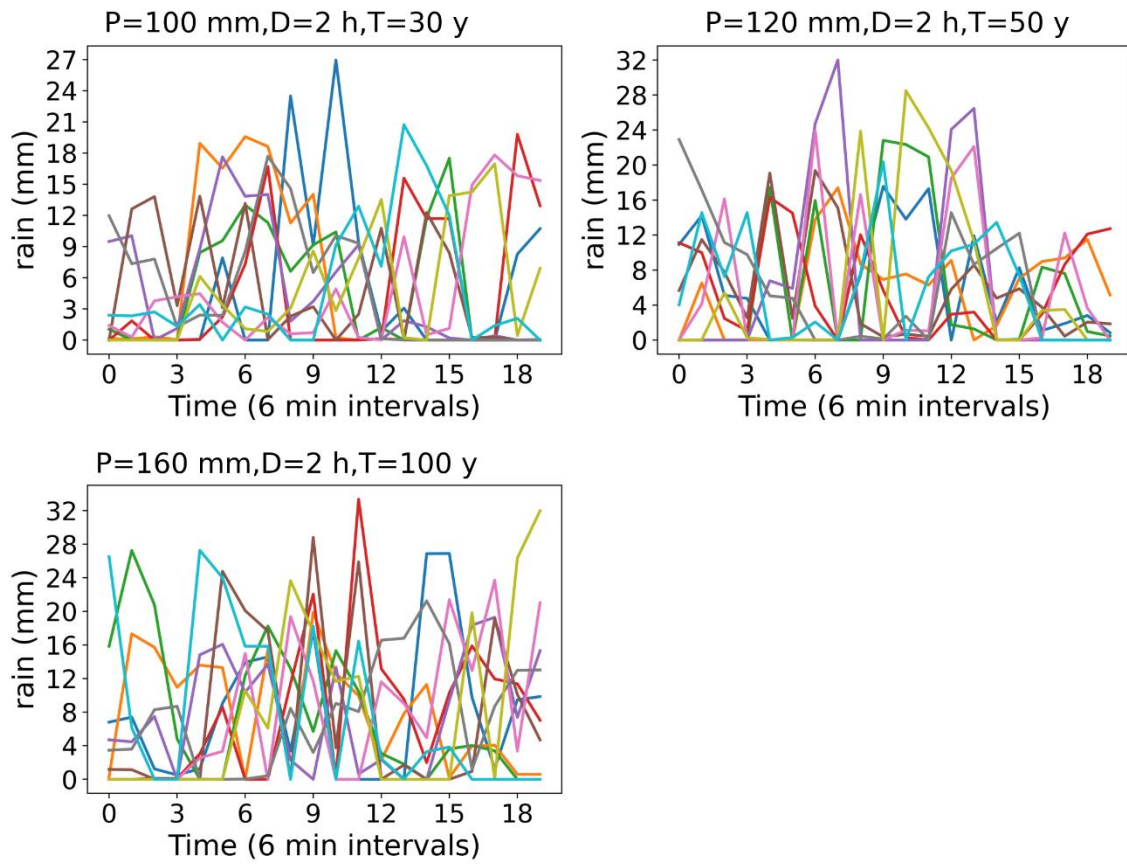

**Fig. S2.** Ten rainfall scenarios (indicated by different colours) for Aix-en-Provence with  $P$  mm rainfall in  $D$  hours (events such as these or more severe than these occur with a return period of  $T$  years).
